# Supplementary material for: Determination of the De Novo Minimum Selection Concentration of Trimethoprim In Vivo for Escherichia coli Using Galleria mellonella
Source: Preprints.org preprint supplement (doi:10.20944/preprints202411.0427.v1), 2024-11-06
Supplement: Supplementary file 1 [file supplementary]

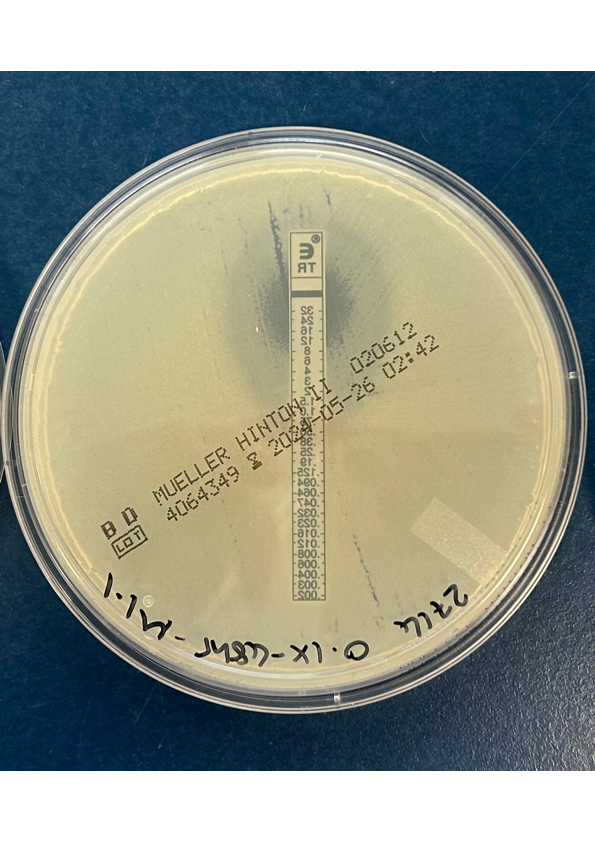


Supplementray Figure 1. A photograph depicting the double ellipse observed in the E-test for isolate 0.1xADI 1.1 (48hrs) 5 days post *in vitro* passaging.
